# Supplementary material for: Melanoma Evolves Complete Immunotherapy Resistance through the Acquisition of a Hypermetabolic Phenotype
Source: Oxford University Press journal article supplement (doi:10.1158/2326-6066.cir-19-0005), 2020-09-11
Supplement: 23266066cir190005-sup-214778_2_supp_6547654_qg3ncx.xlsx [file 23266066cir190005-sup-214778_2_supp_6547654_qg3ncx.xlsx]

## Sheet: Patient  
	Supplemental Table 1 - Patient Demographics and Responses
	Sample name	Internal patient ID	Tissue source	Timepoint	Treatment	Previous Ipilumimab	Response (PD = progressive disease; SD = stable disease; PR = partial response; CR = complete response)	Age	Gender
	9983140070_B	108	Melanoma tumor biopsy	Pre-treatment	Ipilimumab+PD1	No	PR	31	F
	9983140070_D	19	Melanoma tumor biopsy	Pre-treatment	PD1	Yes	PD	60	F
	9983140070_E	27	Melanoma tumor biopsy	Pre-treatment	PD1	Yes	PD	34	M
	9983140070_G	38	Melanoma tumor biopsy	Pre-treatment	PD1	Yes	SD	52	M
	9983140070_H	40	Melanoma tumor biopsy	Pre-treatment	PD1	Yes	PD	47	F
	9983140070_I	43	Melanoma tumor biopsy	Pre-treatment	PD1	Yes	PD	61	F
	9983140070_K	72	Melanoma tumor biopsy	Pre-treatment	PD1	Yes	CR	32	M
	9983140070_L	112	Melanoma tumor biopsy	Pre-treatment	PD1	Yes	PD	75	F
	9983140041_D	135	Melanoma tumor biopsy	Pre-treatment	Ipilimumab+PD1	No	CR	67	M
	9983140041_G	106a	Melanoma tumor biopsy	Pre-treatment	PD1	Yes	PR	64	F
	SD = Stable Disease, PR = Partial Response, CR = Complete Response all as defined by RECIST 1.1.
